# Supplementary material
Source: PubMed Central journal article supplement (PMC3962240)

Figure S1. Parologue age distributions and SiZer plots of the *Linum* species in high-quality format. The species is indicated on the cladogram positioned on the left of each page, highlighted in red.

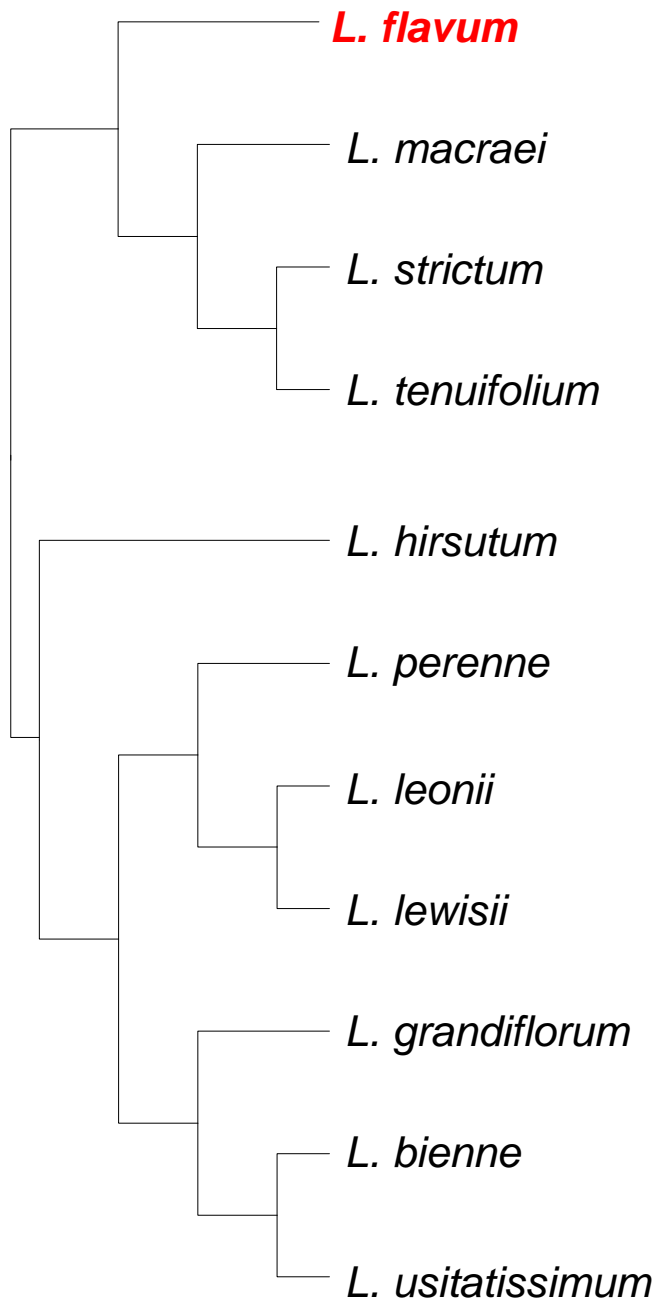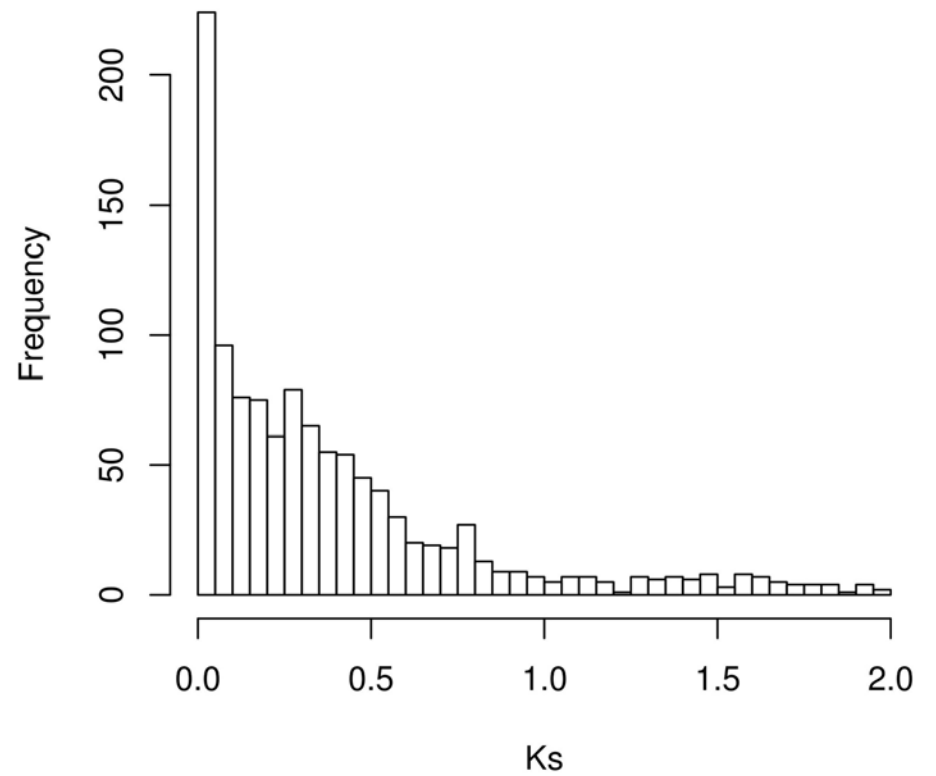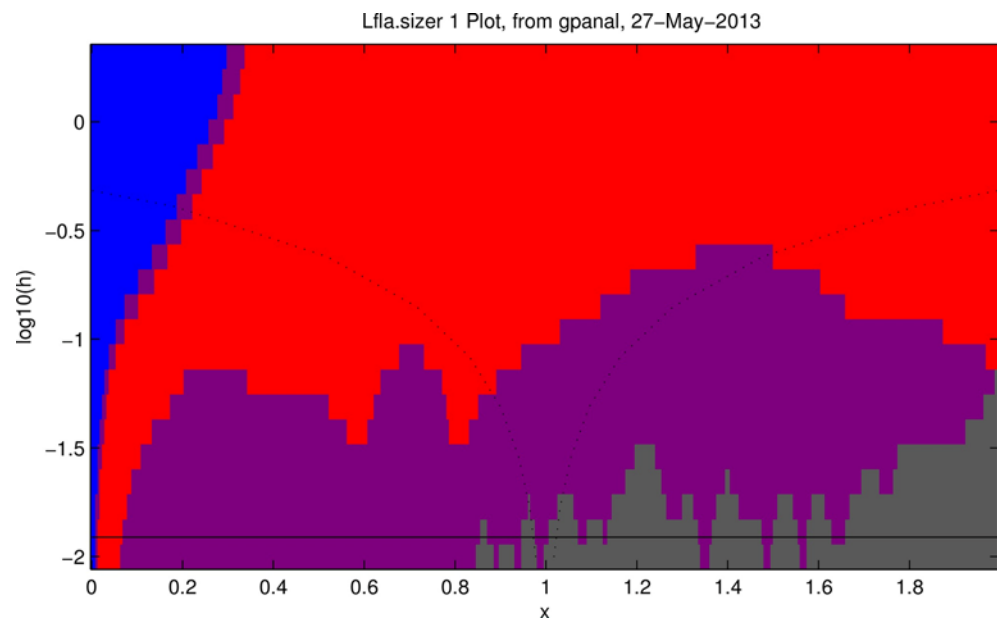

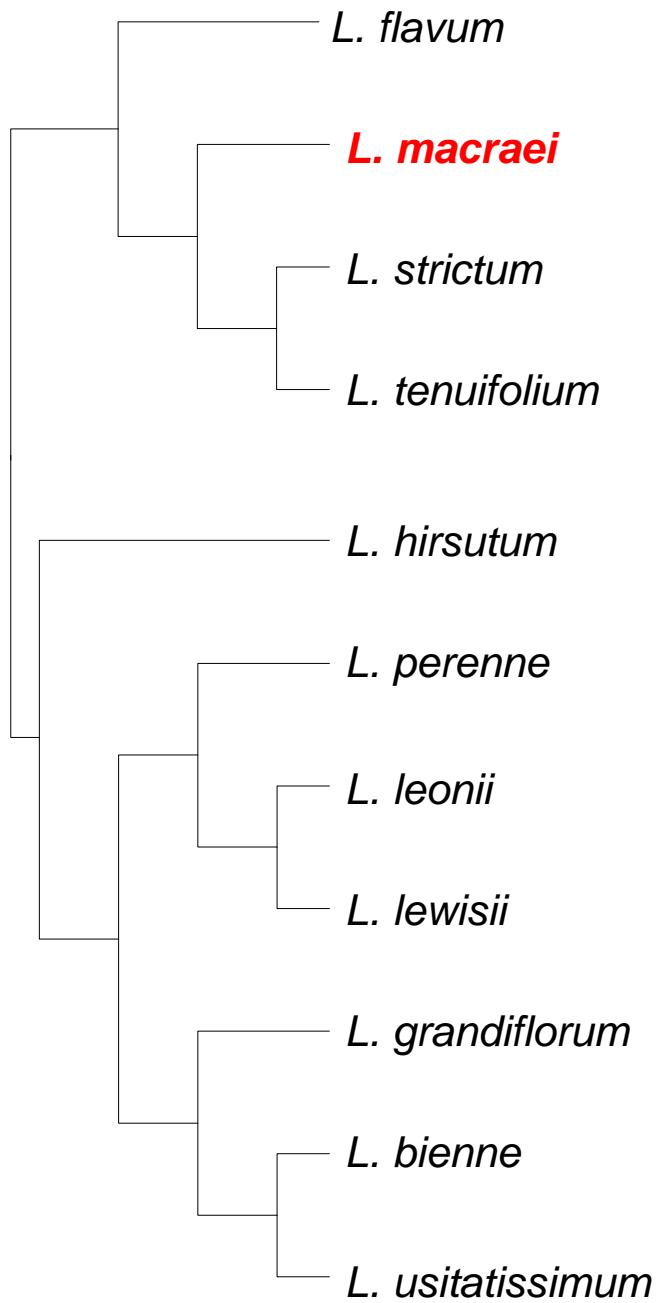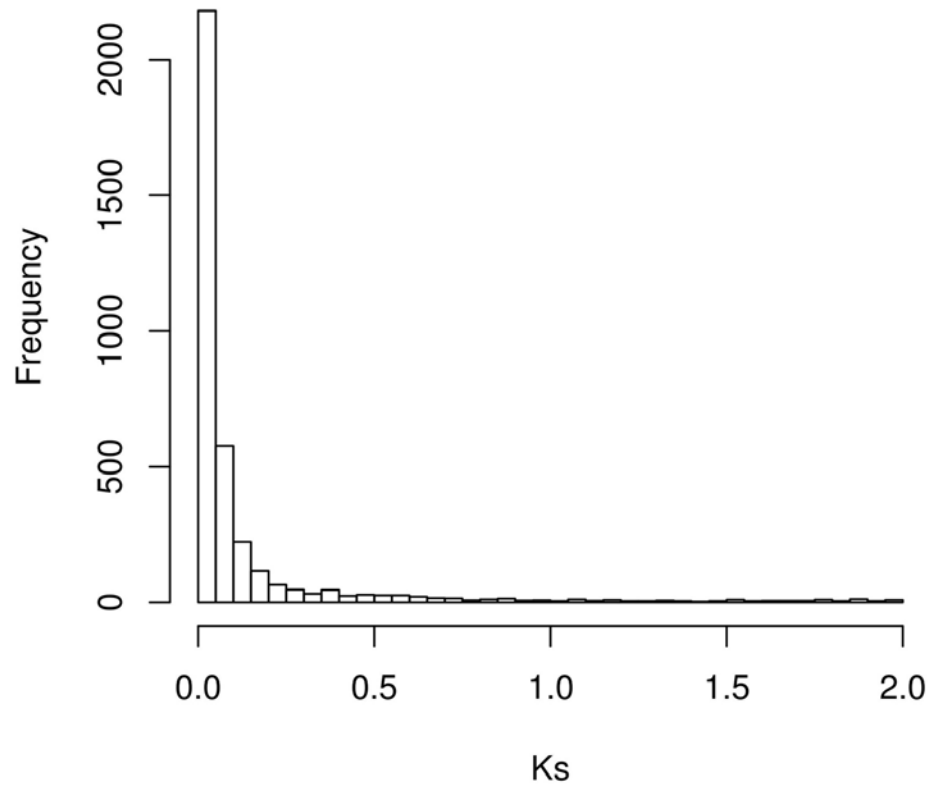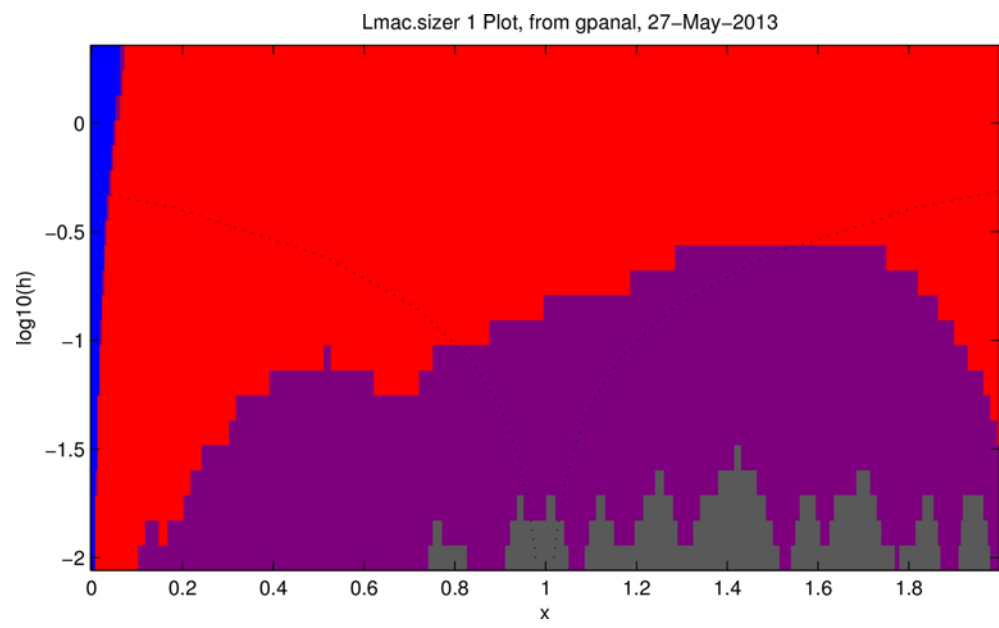

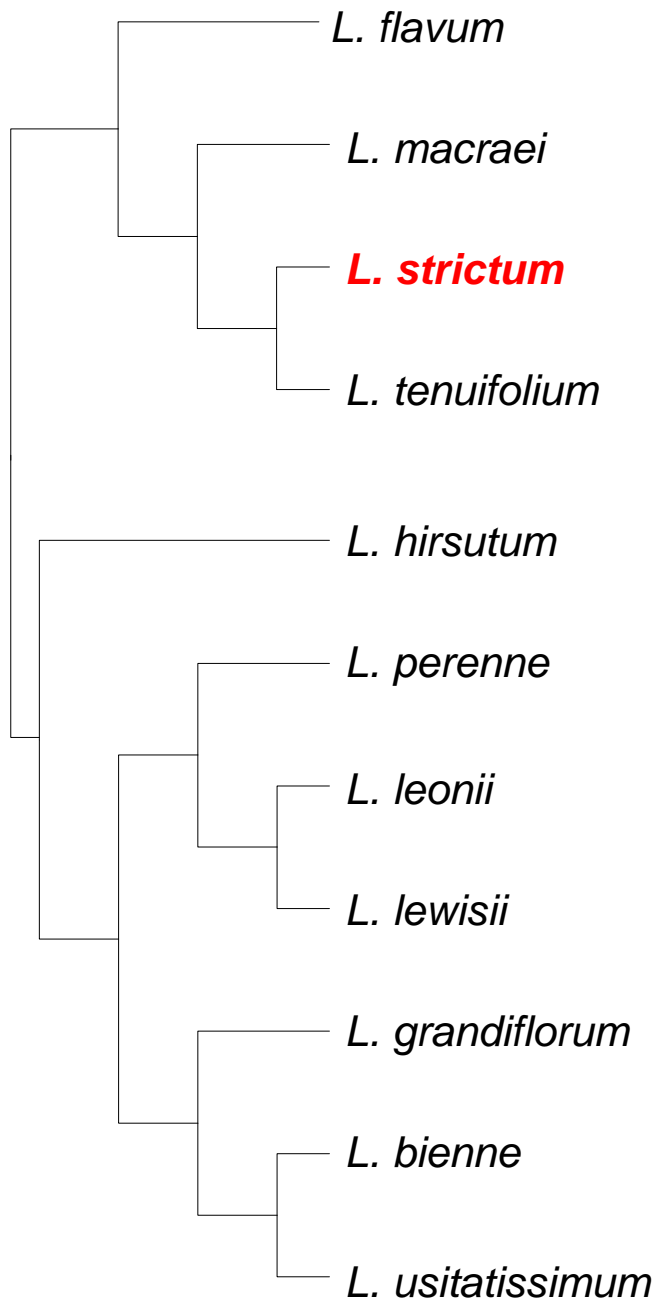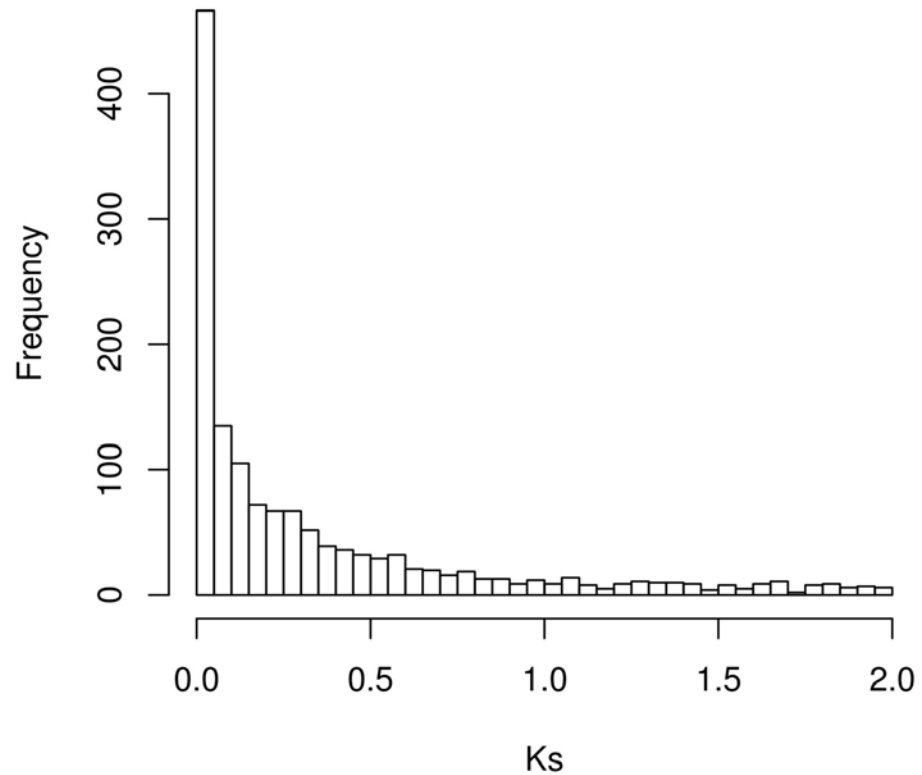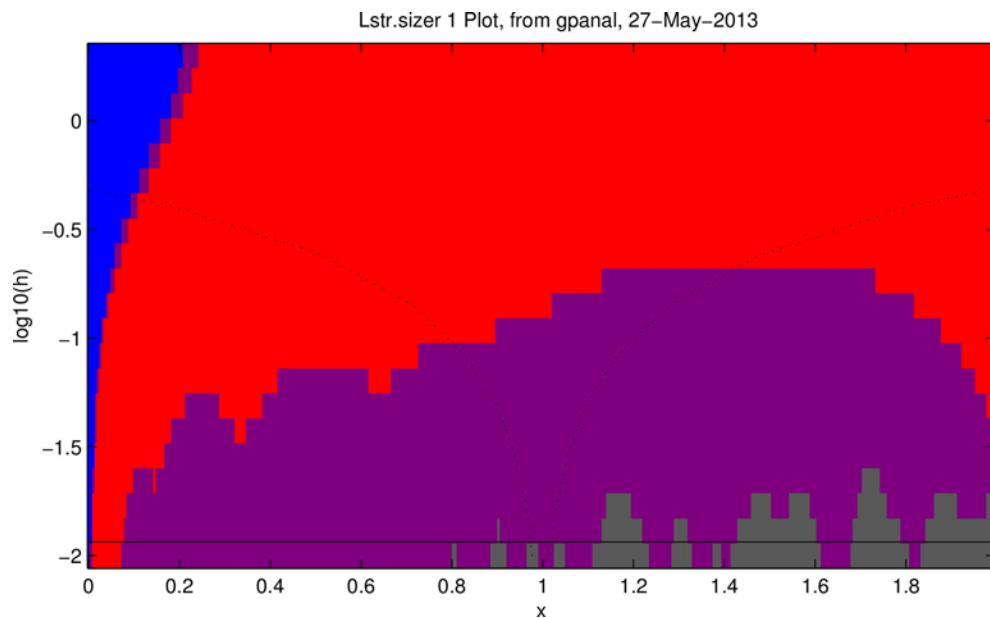

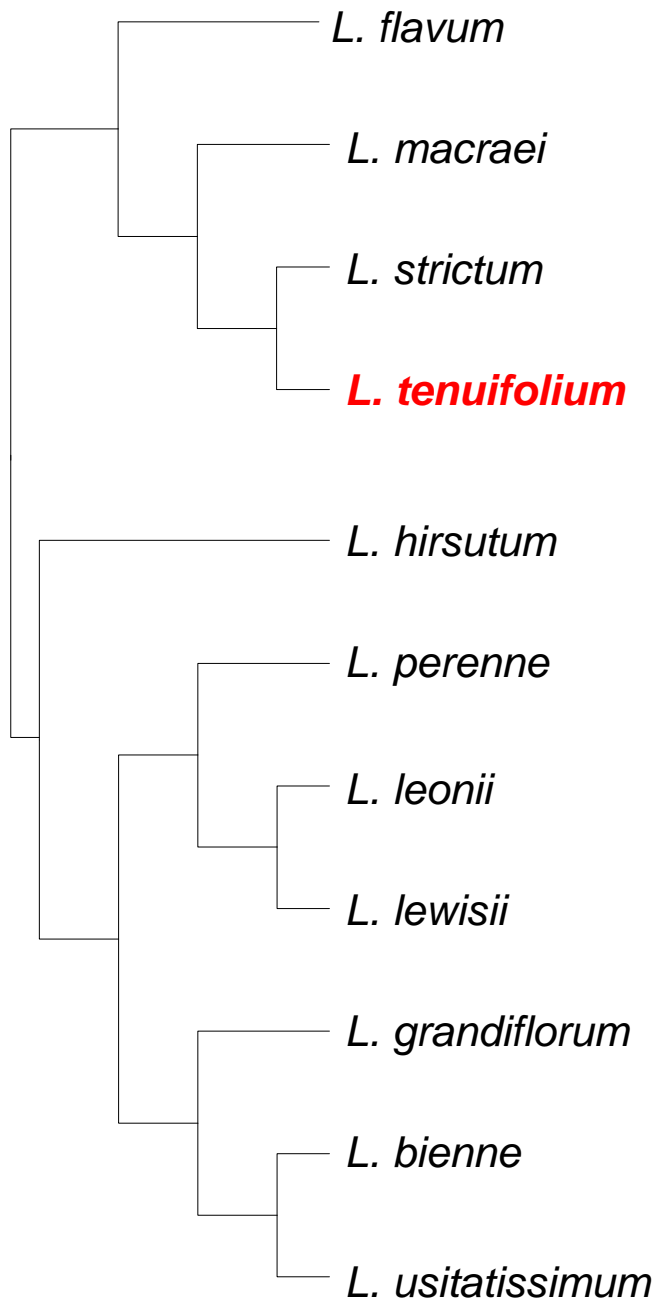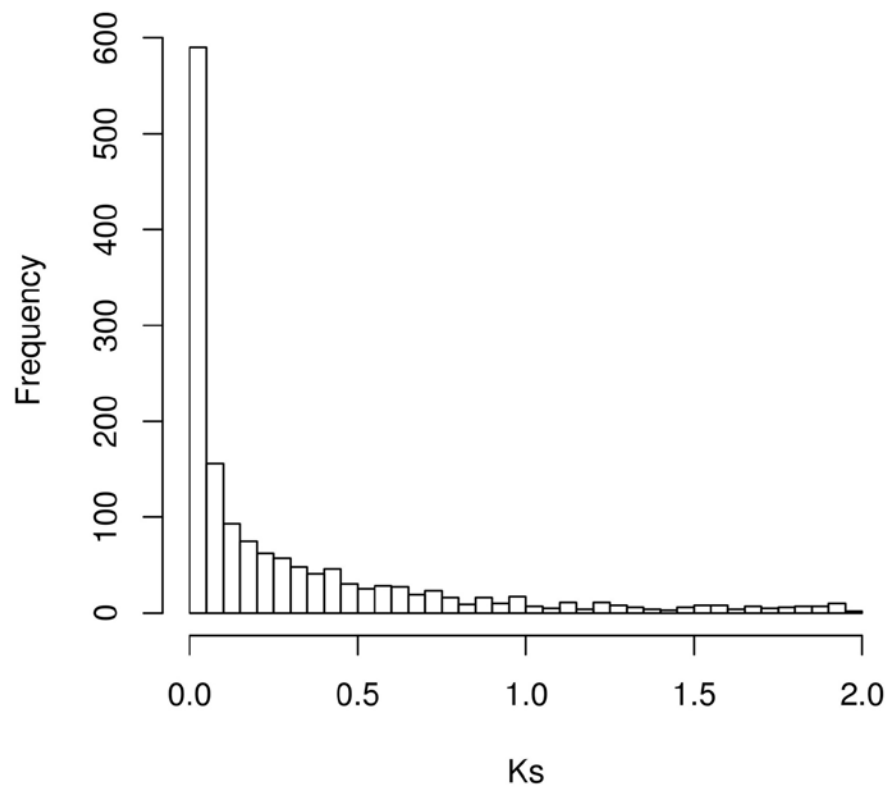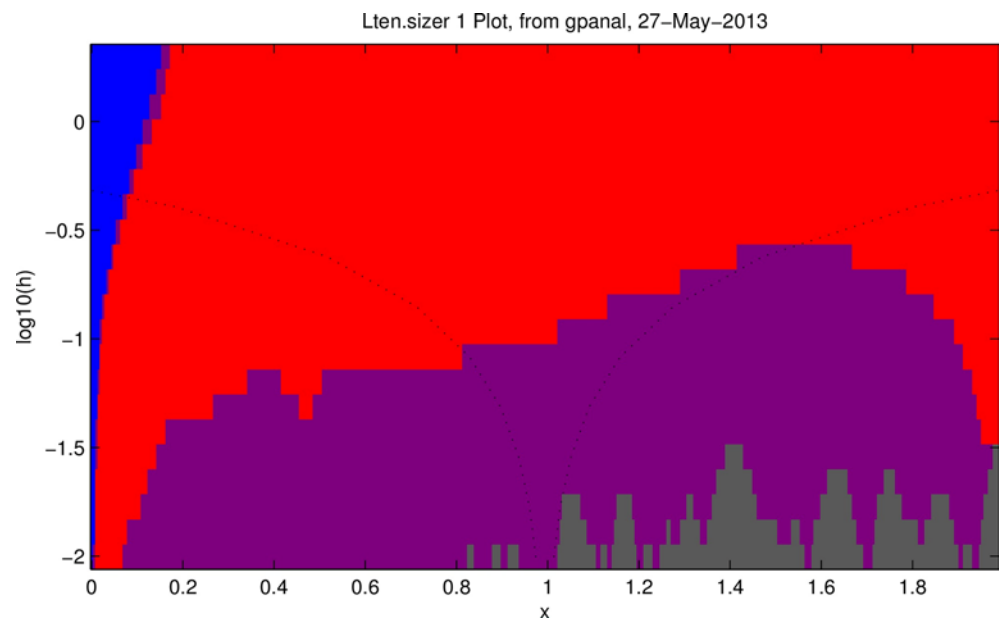

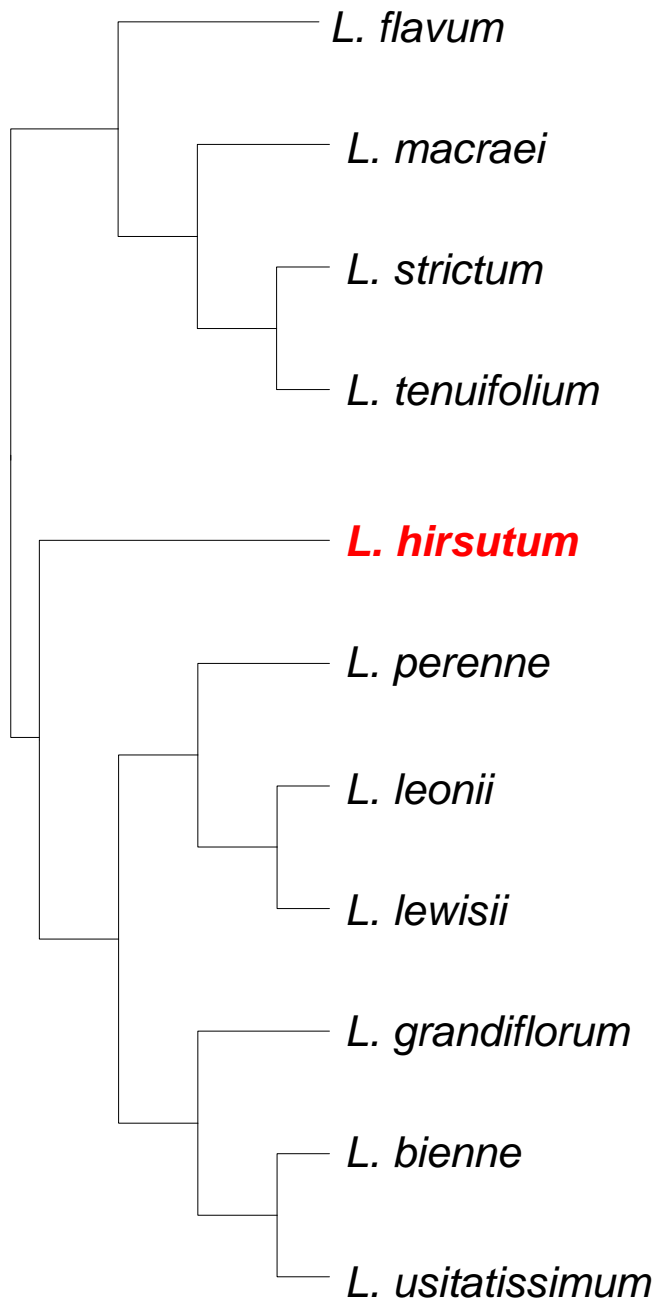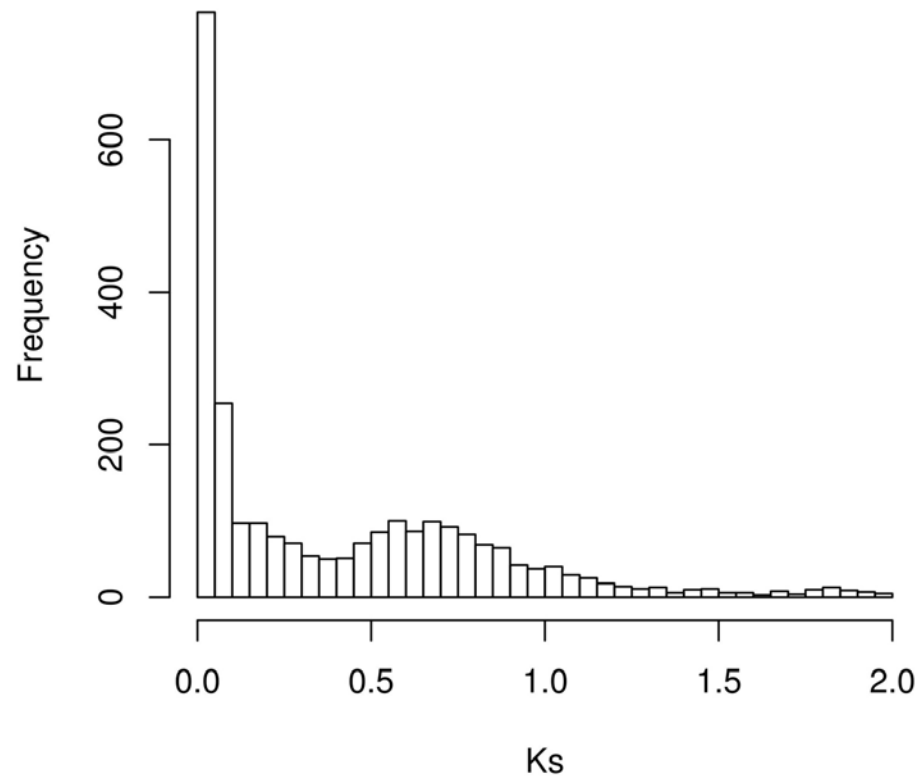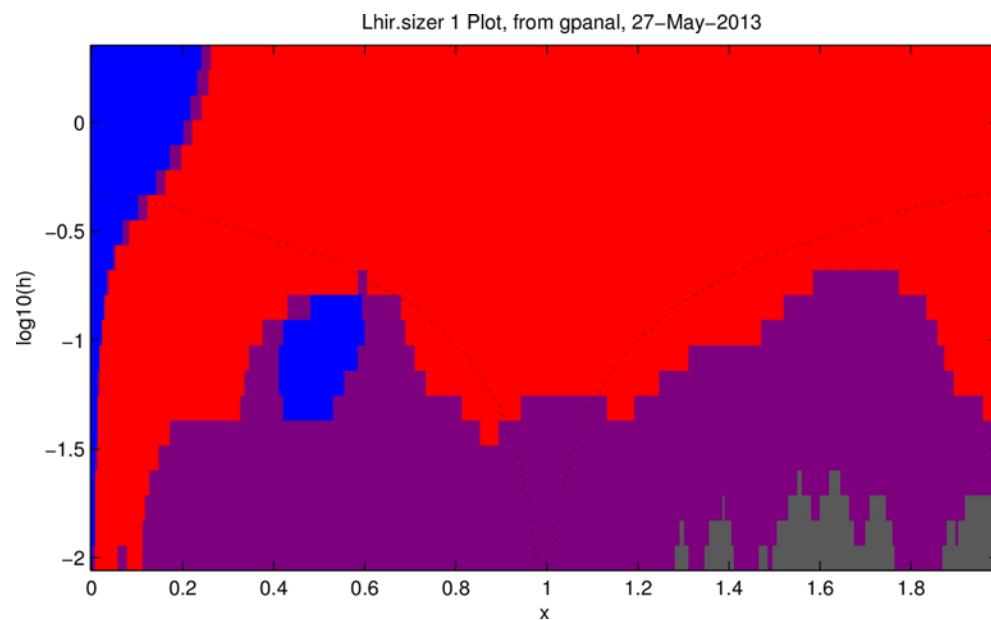

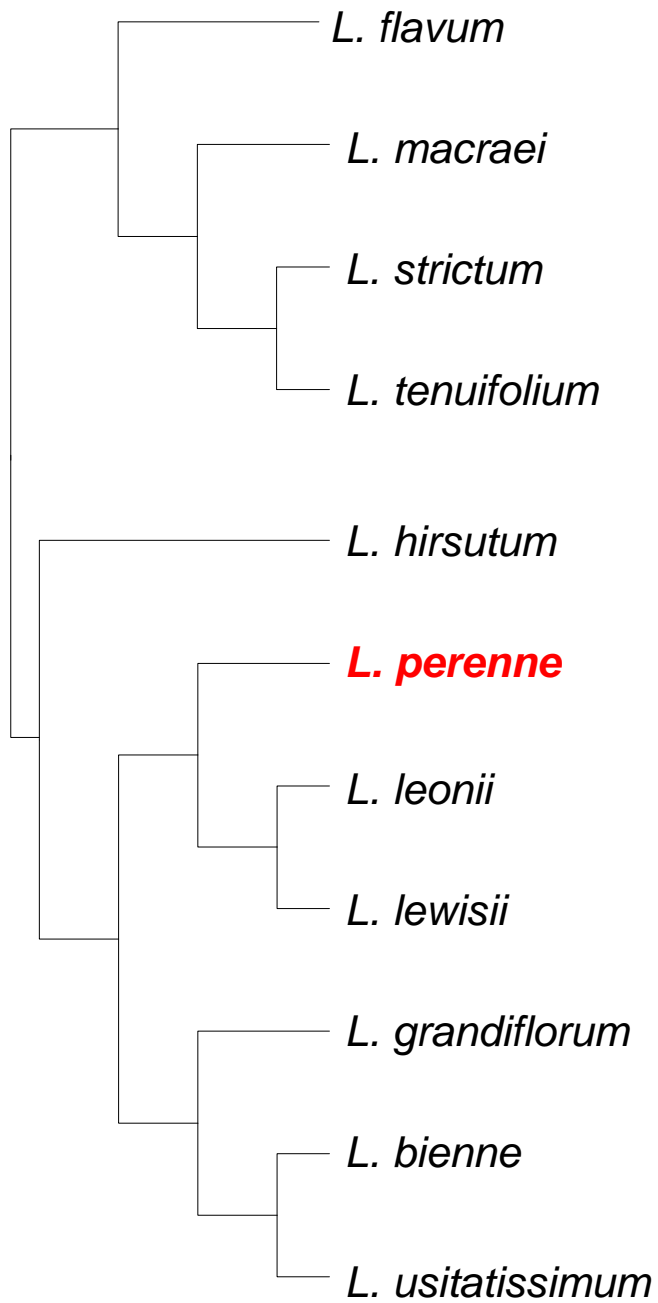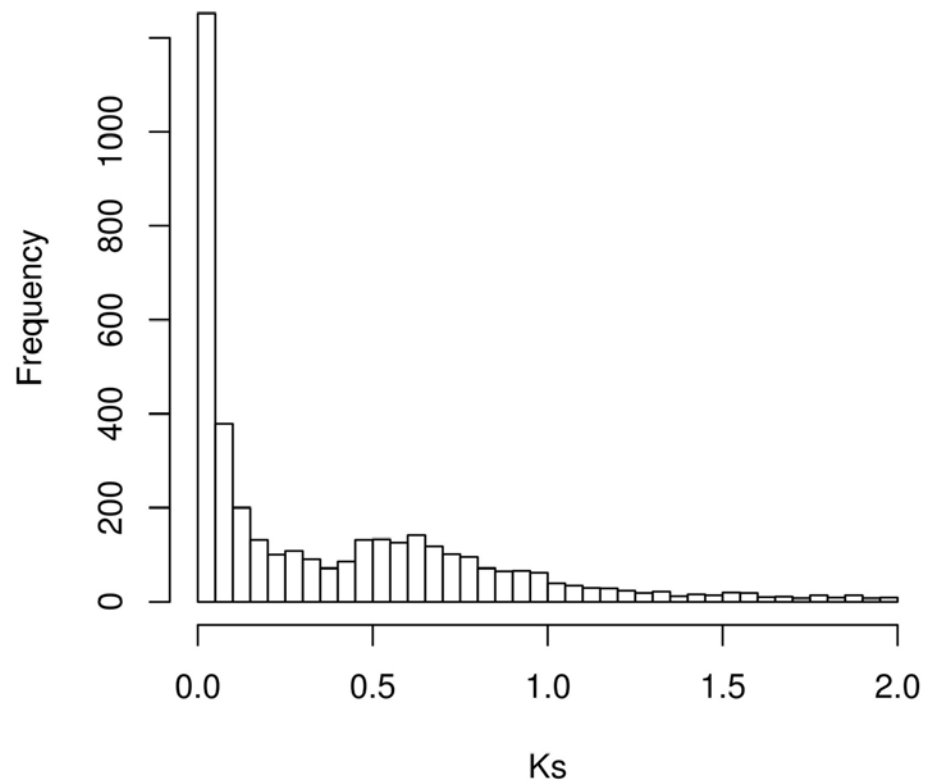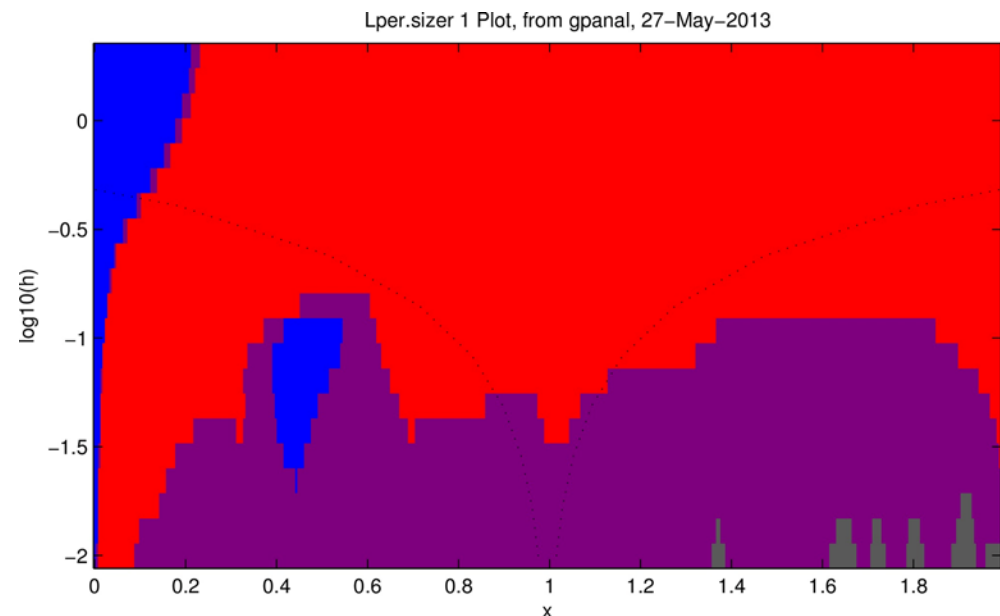

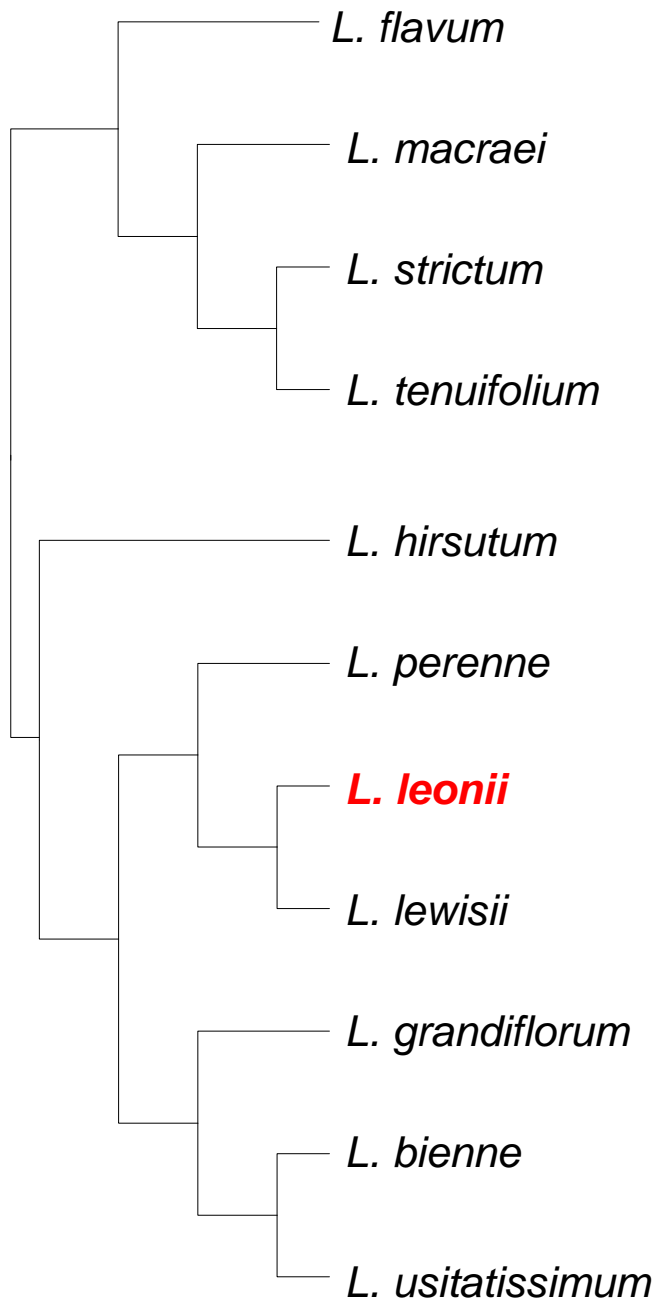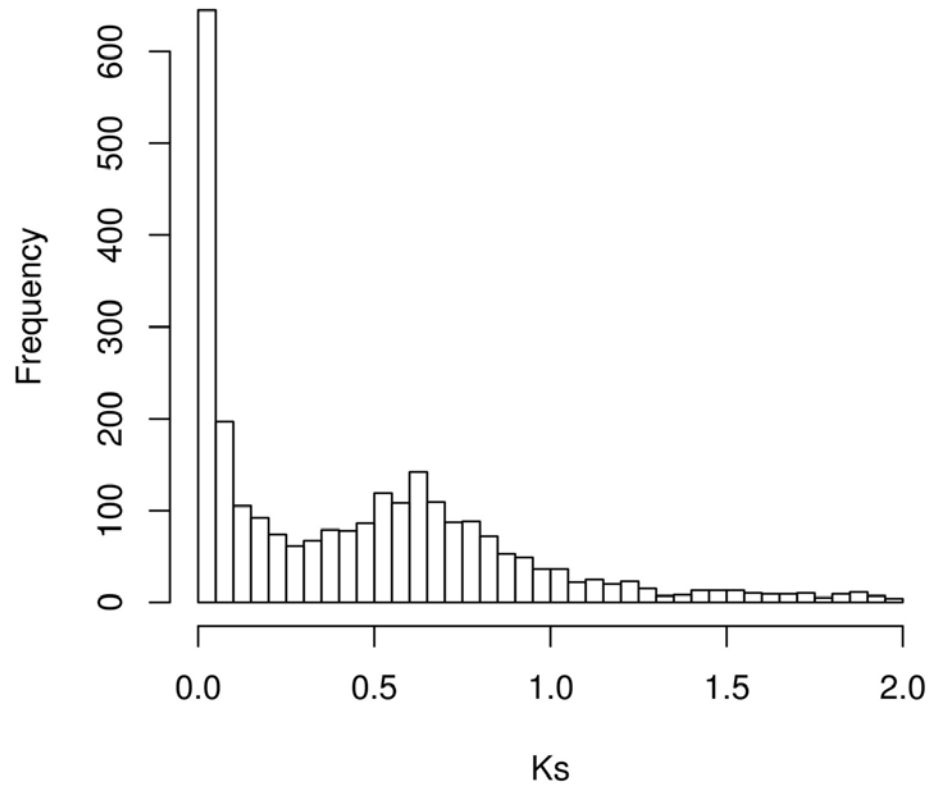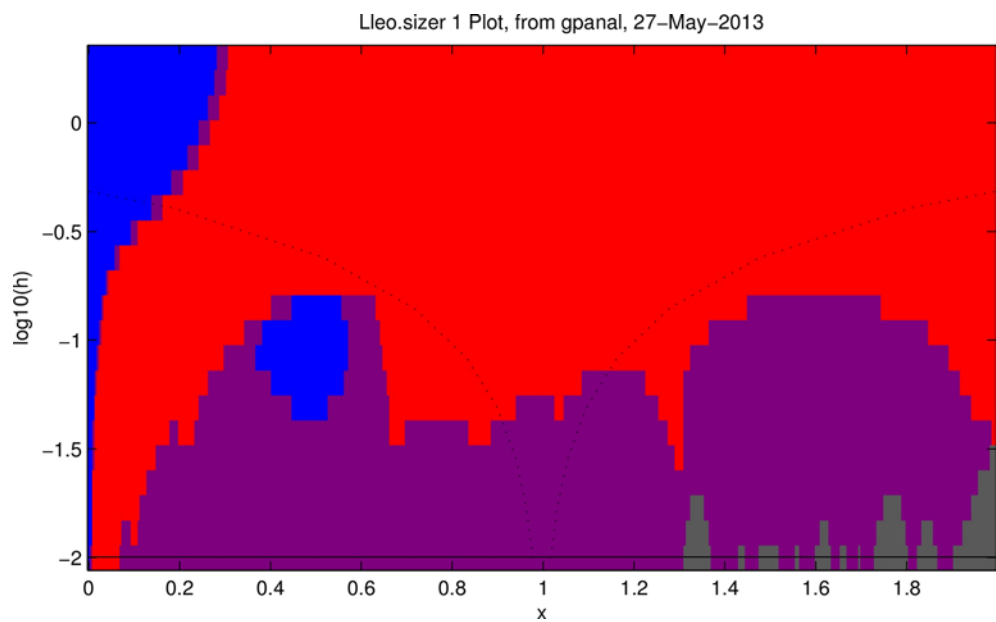



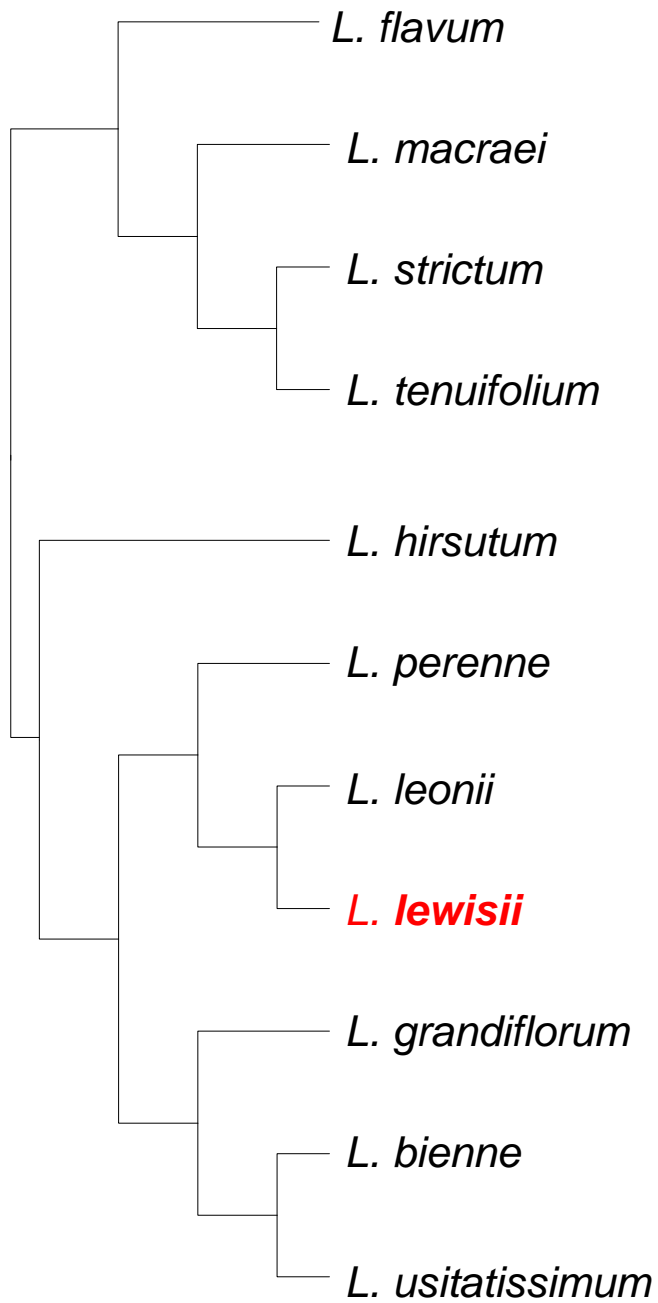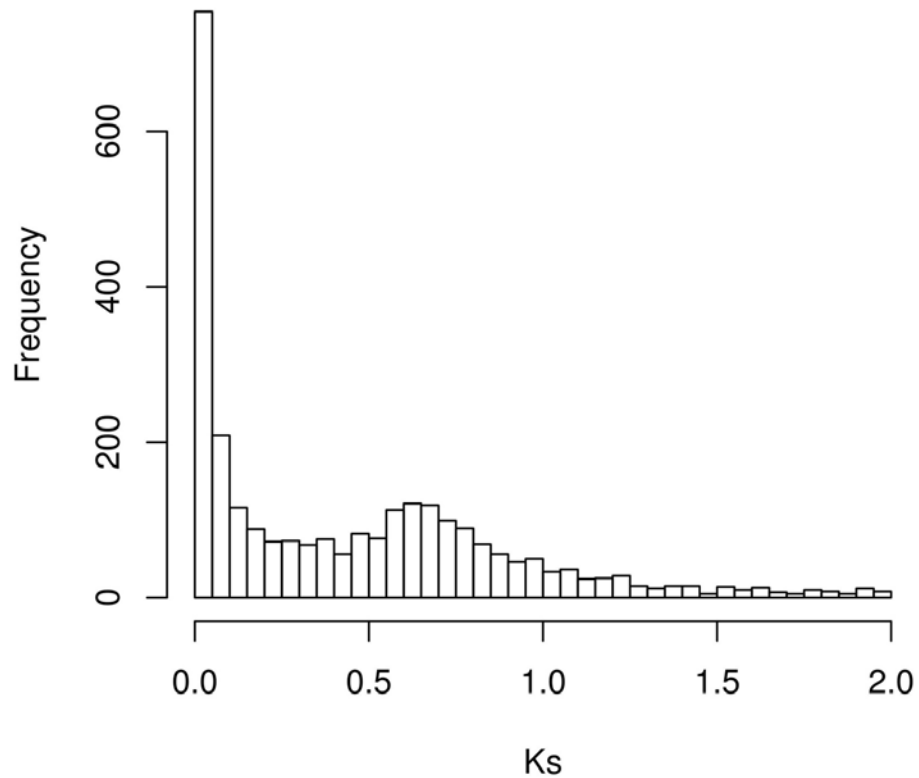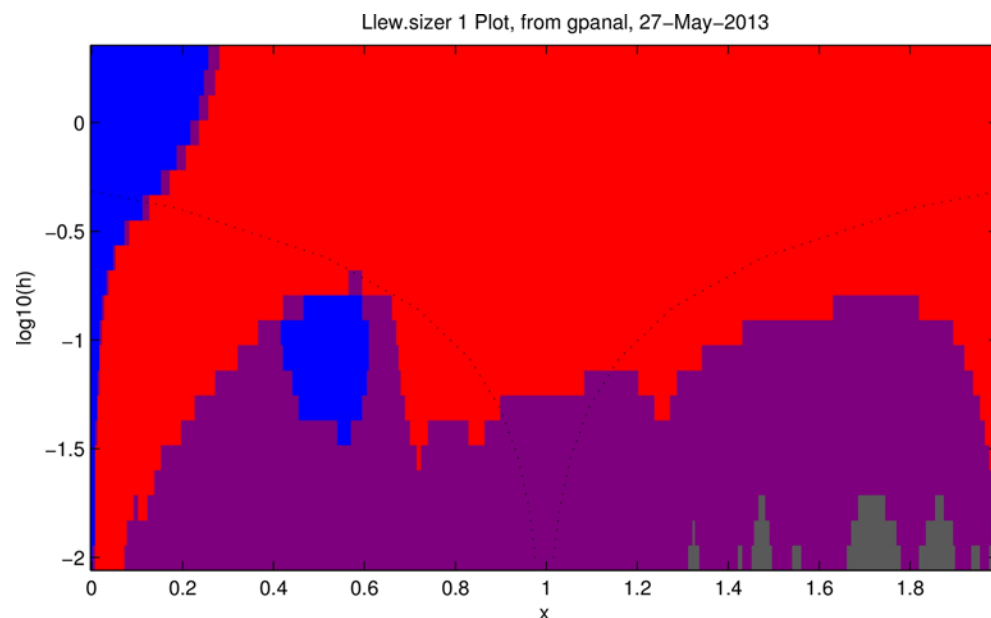

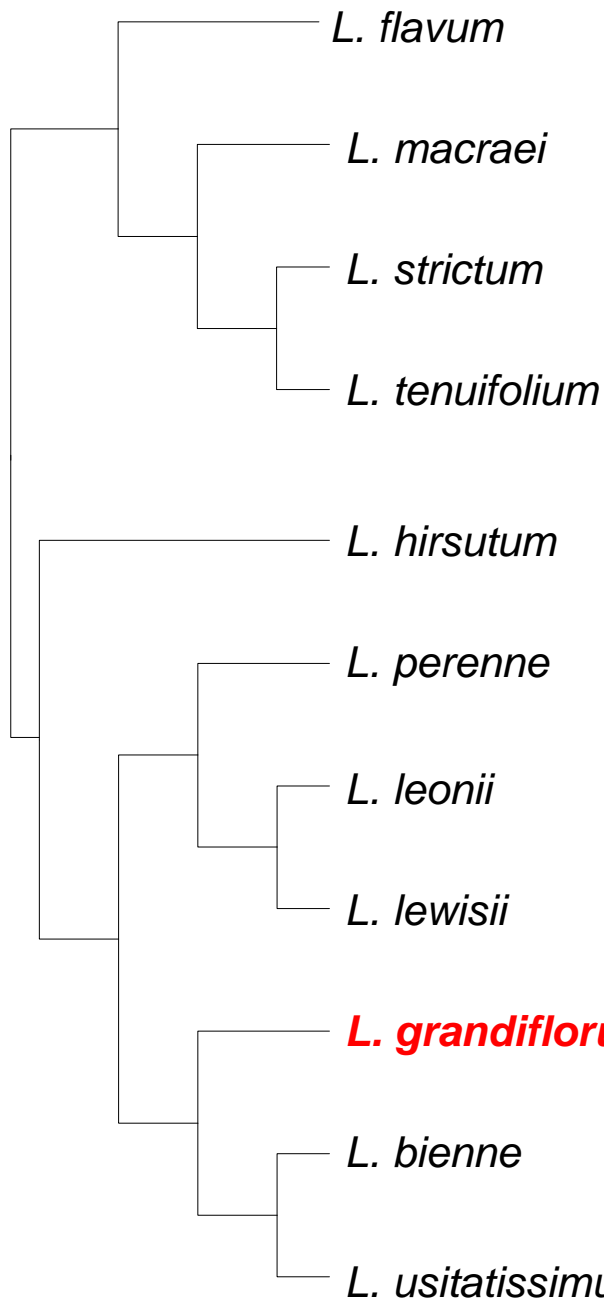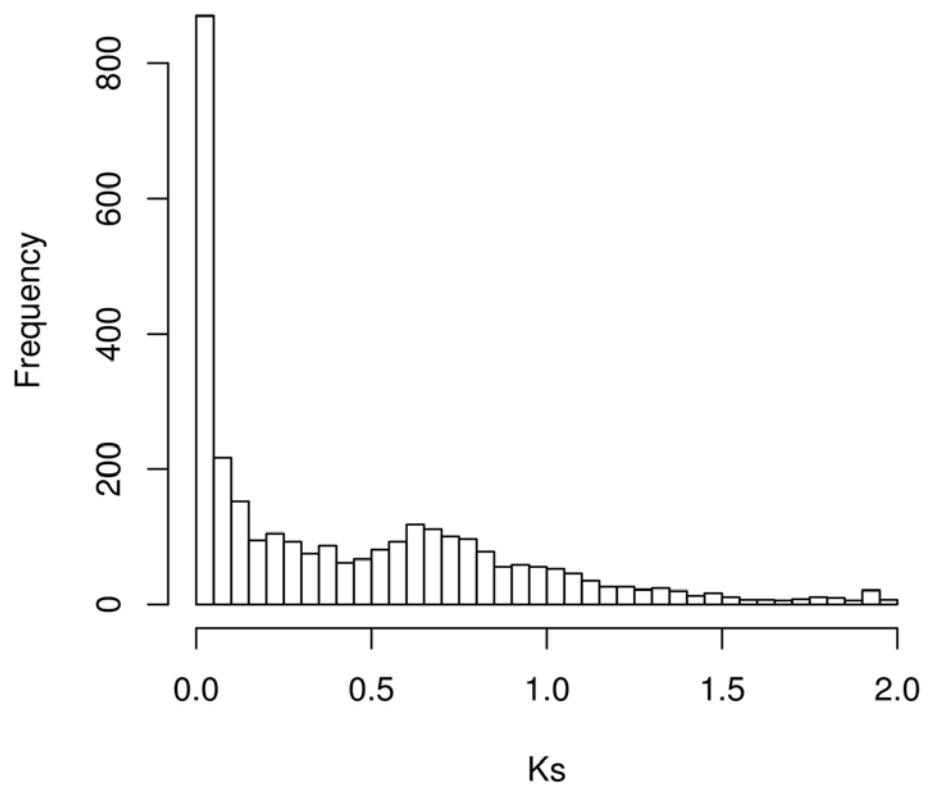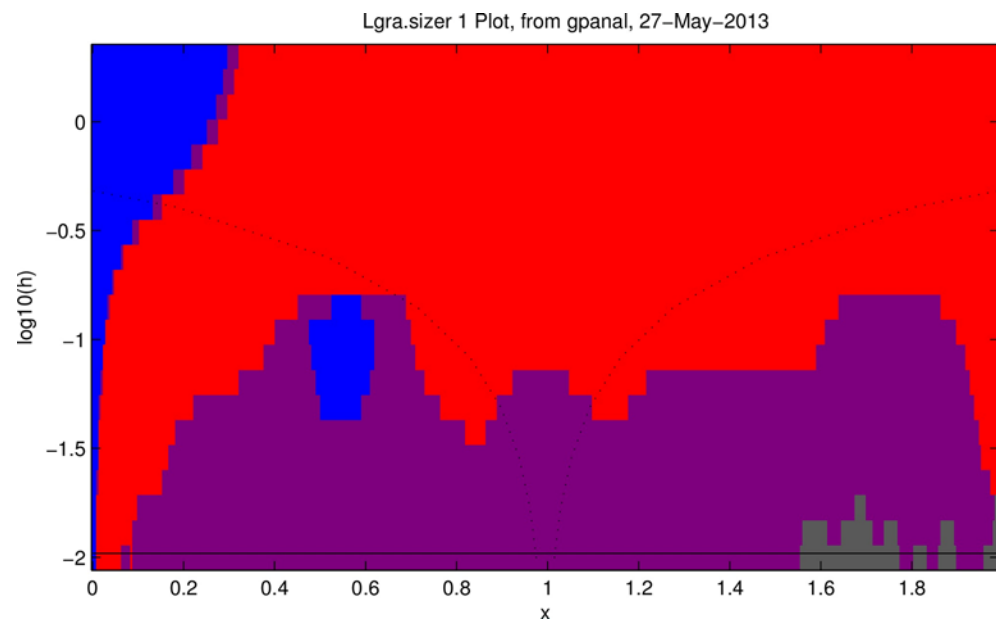

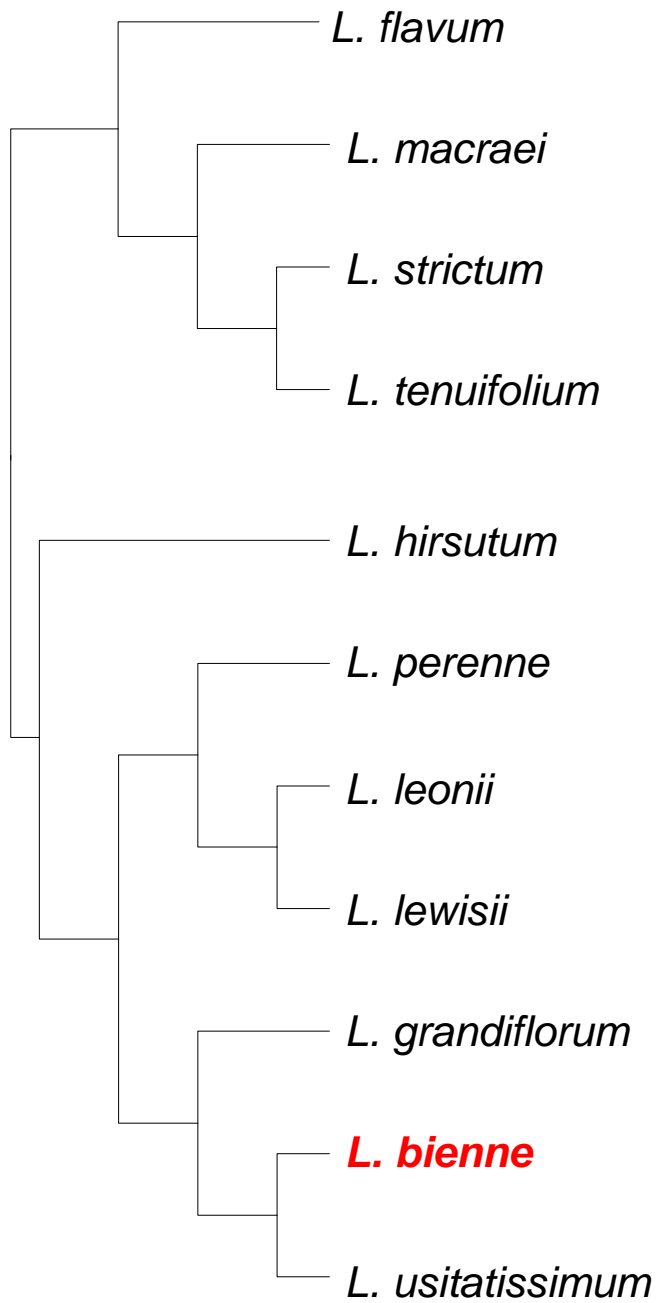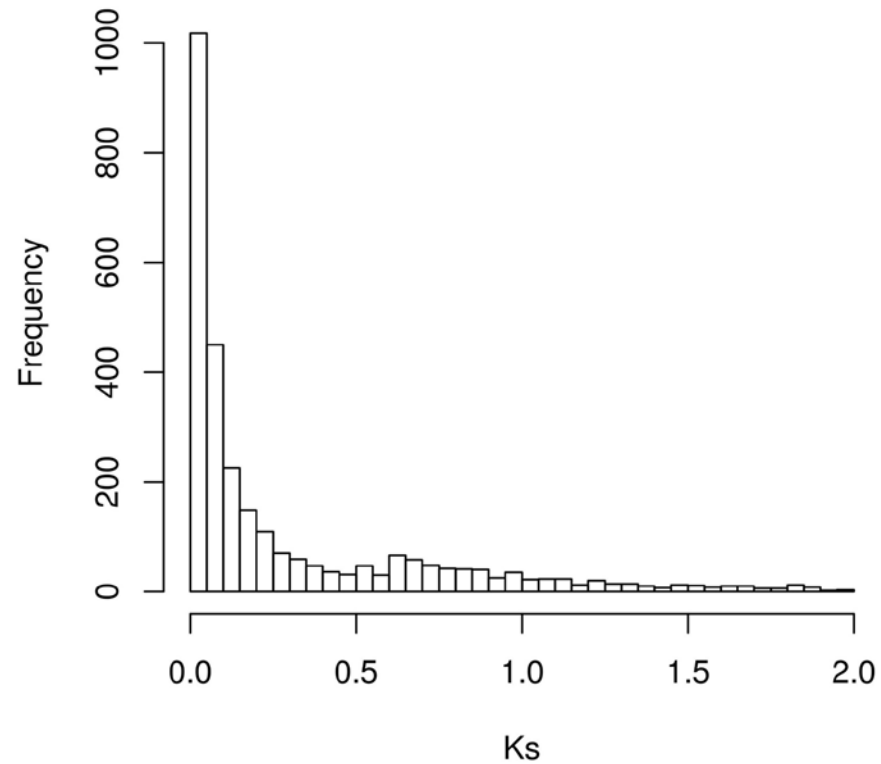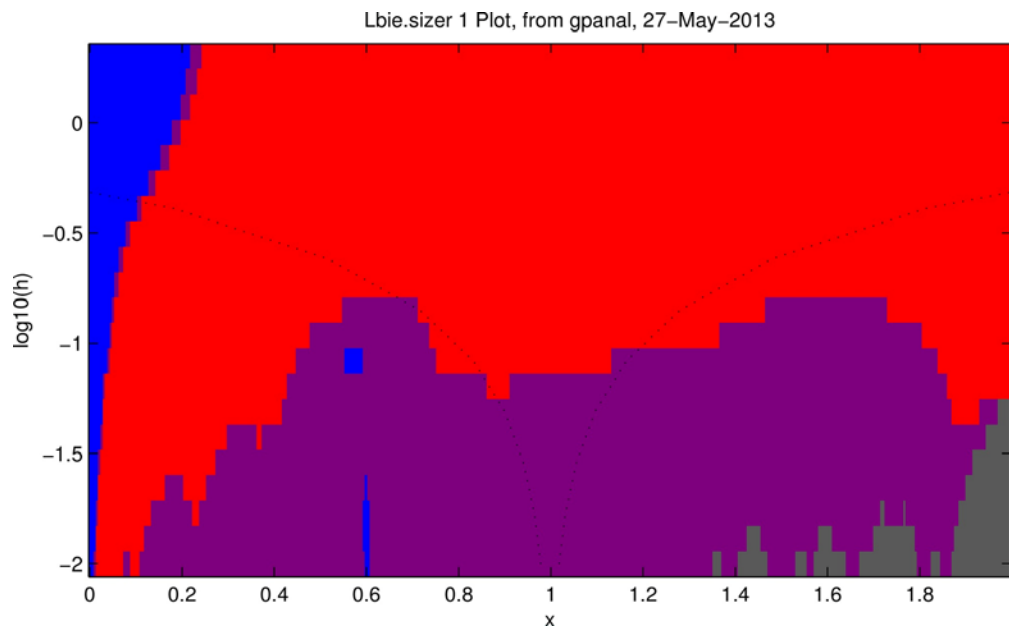

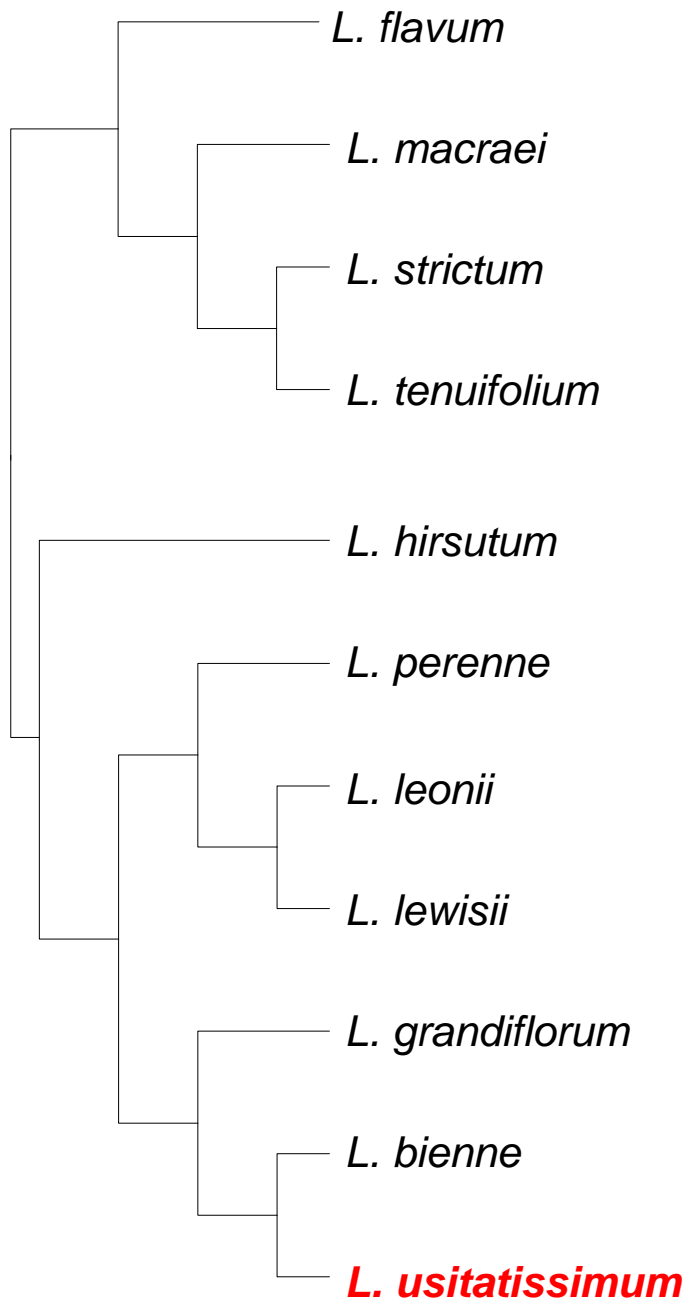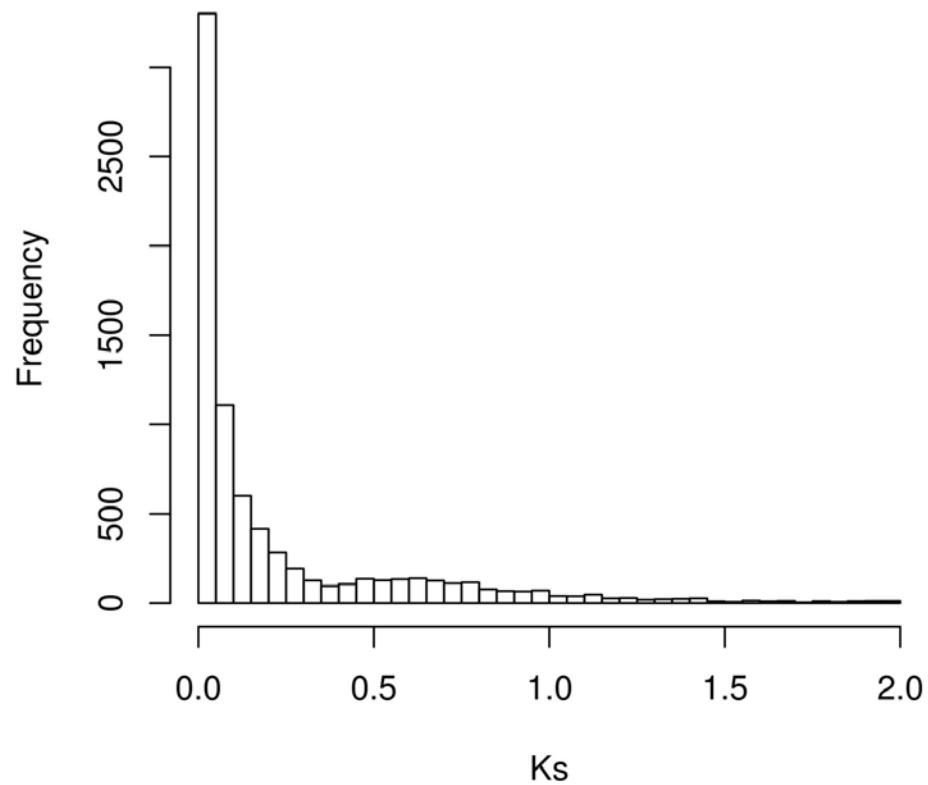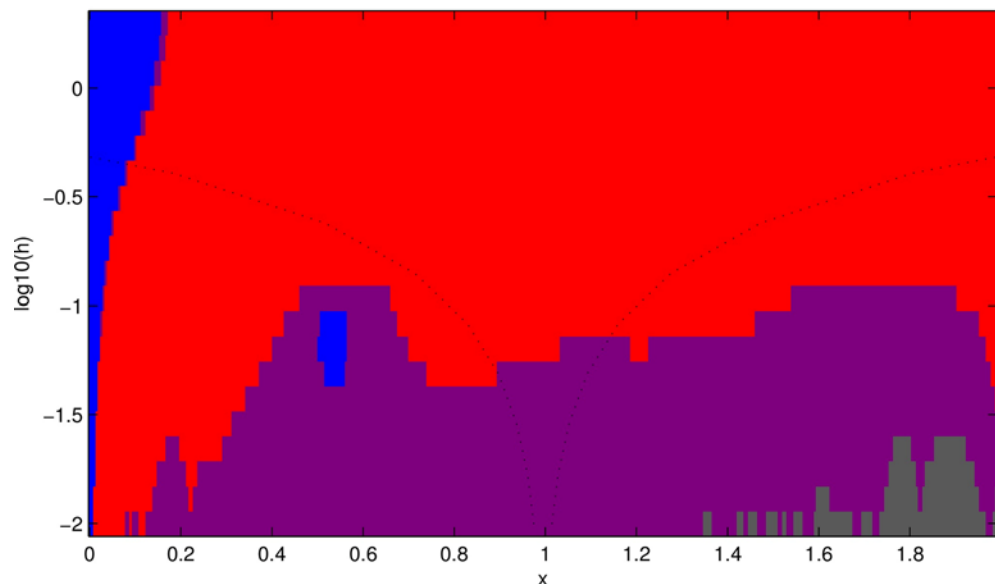

Supplement: supp_mct306_mct306supp.pdf [file supp_mct306_mct306supp.pdf]
